# Supplementary material
Source: publisher figshare collection journal article supplement (https://acs.figshare.com/ndownloader/files/5469821)
Supplement: Supplementary file 1 [file 5469821]

## Supporting Information

### Investigating the Transformations of Polyoxoanions Using Mass Spectrometry and Molecular Dynamics

Jamie M. Cameron,<sup>a,c</sup> Laia Vilà-Nadal,<sup>a</sup> Ross S. Winter,<sup>a</sup> Fumichika Iijima,<sup>c</sup>  
Juan Carlos Murillo,<sup>b</sup> Antonio Rodríguez-Forte<sup>b</sup>, Hiroki Oshio,<sup>c</sup> Josep M.  
Poblet<sup>\*b</sup> and Leroy Cronin<sup>\*a</sup>

<sup>a</sup>*WestCHEM, School of Chemistry, The University of Glasgow, Glasgow, UK, G12 8QQ.*

<sup>b</sup>*Departament de Química Física i Inorgànica, Universitat Rovira i Virgili, C/ Marcel·lí  
Domingo 1, 43007 Tarragona, Spain*

<sup>c</sup>*Department of Chemistry, Graduate School of Pure and Applied Sciences,*

*University of Tsukuba, Tennodai 1-1-1, Tsukuba 305-8571, Japan*

*E-mail: [josepmaria.poblet@urv.cat](mailto:josepmaria.poblet@urv.cat); [Lee.Cronin@glasgow.ac.uk](mailto:Lee.Cronin@glasgow.ac.uk)*

## **Materials, Physical Measurements and Computational Details**

All reagents were purchased commercially from *Sigma Aldrich* or *Alfa Aesar* and used without further purification. HPLC grade solvents were purchased from *Fisher Scientific* and used as received.

$\text{K}_8[\beta_2\text{-SiW}_{11}\text{O}_{39}]\cdot 14\text{H}_2\text{O}$  was synthesized according to the previously reported procedure.<sup>1</sup>

**Synthesis of  $\text{K}_8[\gamma\text{-SiW}_{10}\text{O}_{36}]\cdot 12\text{H}_2\text{O}$ :** The synthesis of  $\text{K}_8[\gamma\text{-SiW}_{10}\text{O}_{36}]\cdot 12\text{H}_2\text{O}$  was performed following the previously reported method by Canny *et al.*, at one quarter scale.<sup>2</sup>  $\text{K}_8[\beta_2\text{-SiW}_{11}\text{O}_{39}]\cdot 14\text{H}_2\text{O}$  (7.5 g) was dissolved with stirring in 75 mL of  $\text{H}_2\text{O}$  and the pH was then adjusted to 9.1 by addition of 2 M  $\text{K}_2\text{CO}_3$  solution. During the reaction time (20 minutes), the pH was carefully maintained at this value by further addition of 0.1 M  $\text{K}_2\text{CO}_3$  solution before the addition of 10 g solid KCl was used to precipitate the final product as a fine white powder.

The identity of product could be confirmed by subsequent IR analysis of the dried powder.

**Preparation of Samples for Time Resolved Mass Spectrometry** Solutions for ESI-MS analysis were prepared by removing 20  $\mu\text{L}$  aliquots of the reaction mixture prior to, following and at timed intervals during the reaction before immediately diluting in a clean glass vial with an additional 1 mL of  $\text{H}_2\text{O}$ . Each solution was then well-mixed prior to their subsequent introduction to the spectrometer.

**Electrospray Ionization Mass Spectrometry (ESI-MS)** was performed on a Waters Synapt-G2 HDMS spectrometer operating in sensitivity mode, equipped with a quadrupole and time of flight (Q/ToF) module for MS analysis. All samples were prepared as described above and injected directly at a flow rate of 5  $\mu\text{L min}^{-1}$  using a *Harvard* syringe pump. All spectra were collected in negative ion mode and subsequently analysed using the *Waters MassLynx v4.1* software.

For all measurements the following parameters were employed: capillary voltage: 1.65 kV; sample cone voltage: 30 V; extraction cone voltage: 4.5 V; source temperature: 80 °C; desolvation temperature: 120 °C; cone gas flow: 20  $\text{L h}^{-1}$  ( $\text{N}_2$ ); desolvation gas flow: 500  $\text{L h}^{-1}$  ( $\text{N}_2$ ).

**Computational details** and relevant references are provided in the main manuscript text. Static Density Functional Theory (DFT) calculations and Classical Molecular Dynamics (CMD) simulations were performed in *in-house computational facilities* in the Quantum Chemistry Group in Tarragona (Spain). Carr Parrinello Molecular Dynamics (CPMD) simulations were performed in the Barcelona Supercomputing Center (BSC).

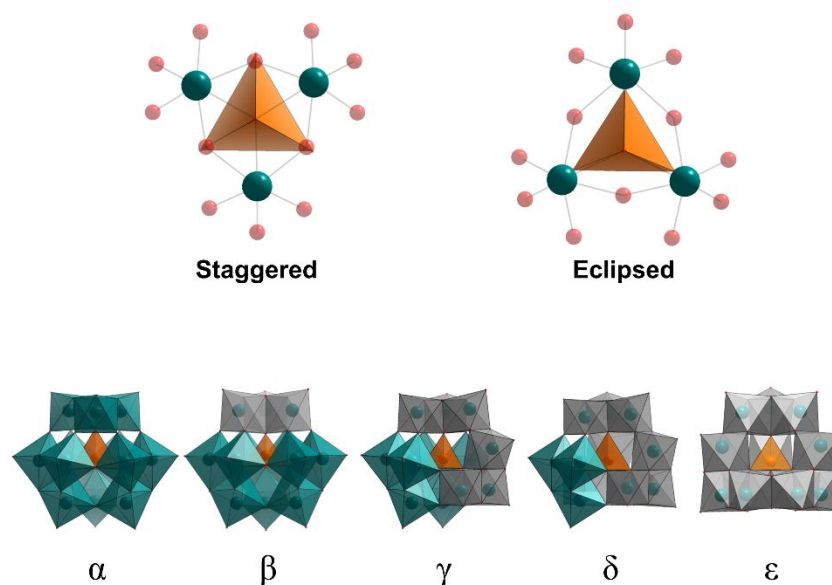

**Figure S1.** Depiction of the geometrical isomerism possible within the Keggin cluster archetype which occurs *via* subsequent  $60^\circ$  rotations of each of the four individual  $\{M_3\}$  triads present in the structure along their three-fold axis. This results in the theoretical existence of five possible isomers which can be distinguished structurally, most easily by considering the conformation of the individual  $\{M_3\}$  triads whereby a rotated group adopts an eclipsed configuration relative to the central heteroatom rather than the native staggered conformation (top). This gives rise to the five, theoretically possible geometric isomers of the Keggin cluster (shown bottom, rotated triads highlighted in grey). Note that the isomerism event which is the focus of our attention in this work occurs between the  $\beta$ - and  $\gamma$ -isomers.

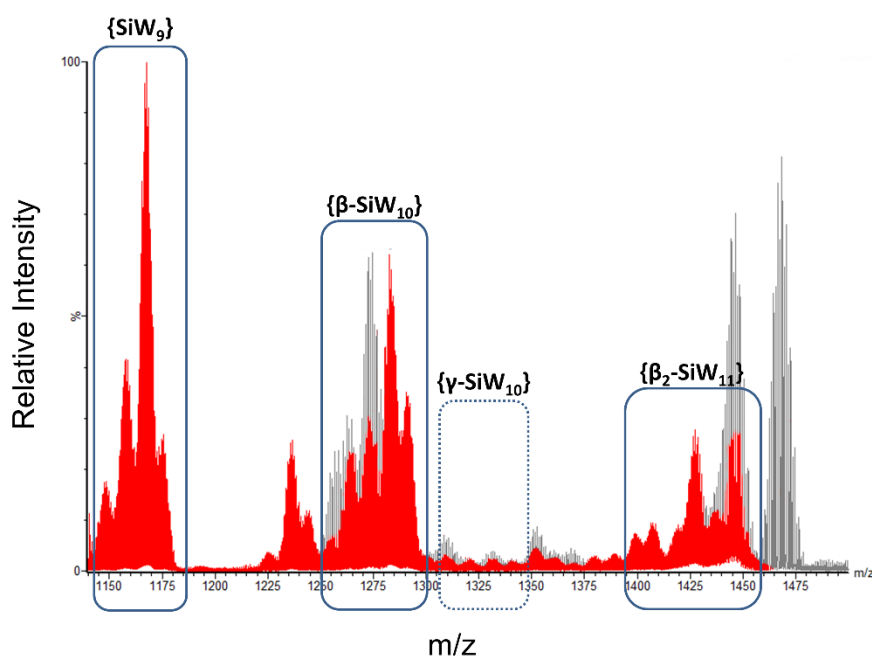

**Figure S2:** ESI-MS spectrum of the  $\beta$ -SiW<sub>11</sub> starting material dissolved in water prior to addition of base and the notional start-point of the reaction. Red envelopes highlight the peaks corresponding to the highlighted anions and grey envelopes represent smaller, singly charged cluster fragments caused by in-source fragmentation and decomposition.

**Table S1:** Comparison of peak assignments obtained during standard measuring conditions (optimized for both peak intensity and analyte stability) and those obtained under a higher cone voltage setting (in which greater in-source fragmentation may occur). In all cases, the intensity of the signals decreases upon increased source settings to the point where several can no longer be detected in the spectrum, indicating their fragmentation to smaller species. This suggests that these species are originating predominantly from solution rather than in-source effects and may therefore be taken as representative of the solution composition. In both series of measurements, spectrometer settings are as described in the methods section above, where only the sample cone voltage has been increased to 55 V in the higher mode settings.

| Anion                    | z  | Assignment                                                                               | m/z. (calc) | Standard Settings | High Settings |
|--------------------------|----|------------------------------------------------------------------------------------------|-------------|-------------------|---------------|
|                          |    |                                                                                          |             | m/z. (obs)        | m/z. (obs)    |
| {SiW <sub>9</sub> }      | 2- | {NaH <sub>7</sub> [SiW <sub>9</sub> O <sub>34</sub> ]}                                   | 1128.7      | 1128.6            | 1128.6        |
|                          | 2- | {Na <sub>2</sub> H <sub>6</sub> [SiW <sub>9</sub> O <sub>34</sub> ]·H <sub>2</sub> O}    | 1148.7      | 1148.7            | 1148.7*       |
|                          | 2- | {KNaH <sub>6</sub> [SiW <sub>9</sub> O <sub>34</sub> ]·H <sub>2</sub> O}                 | 1156.7      | 1156.6            | 1156.6*       |
|                          | 2- | {KNa <sub>2</sub> H <sub>5</sub> [SiW <sub>9</sub> O <sub>34</sub> ]}                    | 1158.7      | 1158.6            | -             |
|                          | 2- | {KNa <sub>2</sub> H <sub>5</sub> [SiW <sub>9</sub> O <sub>34</sub> ]·H <sub>2</sub> O}   | 1167.7      | 1167.6            | -             |
|                          | 2- | {K <sub>2</sub> NaH <sub>5</sub> [SiW <sub>9</sub> O <sub>34</sub> ]·H <sub>2</sub> O}   | 1175.7      | 1175.6            | -             |
| {β-SiW <sub>10</sub> }   | 2- | {NaH <sub>7</sub> [SiW <sub>10</sub> O <sub>37</sub> ]}                                  | 1244.7      | 1244.6            | 1245.0        |
|                          | 2- | {NaH <sub>7</sub> [SiW <sub>10</sub> O <sub>37</sub> ]·H <sub>2</sub> O}                 | 1253.7      | 1254.1            | 1253.2*       |
|                          | 2- | {Na <sub>2</sub> H <sub>6</sub> [SiW <sub>10</sub> O <sub>37</sub> ]·H <sub>2</sub> O}   | 1264.7      | 1264.6            | -             |
|                          | 2- | {KNaH <sub>6</sub> [SiW <sub>10</sub> O <sub>37</sub> ]·H <sub>2</sub> O}                | 1272.7      | 1273.1            | 1273.1*       |
|                          | 2- | {KNa <sub>2</sub> H <sub>5</sub> [SiW <sub>10</sub> O <sub>37</sub> ]·H <sub>2</sub> O}  | 1283.6      | 1283.5            | -             |
|                          | 2- | {K <sub>2</sub> NaH <sub>5</sub> [SiW <sub>10</sub> O <sub>37</sub> ]·H <sub>2</sub> O}  | 1291.6      | 1291.5            | 1291.1*       |
| {γ-SiW <sub>10</sub> }** | 2- | {K <sub>3</sub> Na <sub>2</sub> H[SiW <sub>10</sub> O <sub>36</sub> ]·H <sub>2</sub> O}  | 1312.6      | -                 | 1313.1        |
|                          | 2- | {K <sub>5</sub> H[SiW <sub>10</sub> O <sub>36</sub> ]}                                   | 1319.6      | 1319.5            | -             |
|                          | 2- | {K <sub>5</sub> Na[SiW <sub>10</sub> O <sub>36</sub> ]}                                  | 1330.6      | 1330.5            | -             |
|                          | 2- | {K <sub>3</sub> Na <sub>3</sub> [SiW <sub>10</sub> O <sub>36</sub> ]·2H <sub>2</sub> O}  | 1332.6      | -                 | 1332.6        |
|                          | 2- | {K <sub>6</sub> [SiW <sub>10</sub> O <sub>36</sub> ]}                                    | 1338.5      | 1338.5            | -             |
|                          | 2- | {K <sub>3</sub> Na <sub>3</sub> [SiW <sub>10</sub> O <sub>36</sub> ]·3H <sub>2</sub> O}  | 1341.6      | -                 | 1341.6        |
| {β-SiW <sub>11</sub> }   | 2- | {KNa <sub>2</sub> H <sub>3</sub> [SiW <sub>11</sub> O <sub>39</sub> ]·2H <sub>2</sub> O} | 1399.6      | 1399.5            | 1399.5        |
|                          | 2- | {K <sub>3</sub> NaH <sub>2</sub> [SiW <sub>11</sub> O <sub>39</sub> ]}                   | 1408.6      | 1408.5            | 1408.1        |
|                          | 2- | {K <sub>3</sub> Na <sub>2</sub> H[SiW <sub>11</sub> O <sub>39</sub> ]}                   | 1419.6      | 1419.5            | 1419.1*       |
|                          | 2- | {K <sub>4</sub> NaH[SiW <sub>11</sub> O <sub>39</sub> ]}                                 | 1427.5      | 1427.5            | 1428.1        |

\* Note that these peaks are low intensity, poorly resolved and often obscured by overlapping singly charged fragments. Their assignment is therefore tentative and only for comparison to those made under optimized source settings (i.e. standard settings).

\*\* It is interesting to note that, whilst none of the signals observed under ideal conditions are readily identifiable under the higher source settings for {γ-SiW<sub>10</sub>}, relatively well resolved envelopes corresponding to different mixed cation salts can be assigned in the same region of the spectrum (as shown above). This phenomena is not unexpected and arises as a result of the different ionization characteristics of each cluster under these conditions. Similar signals can be observed for {β-SiW<sub>11</sub>} in particular, but will not be described here.

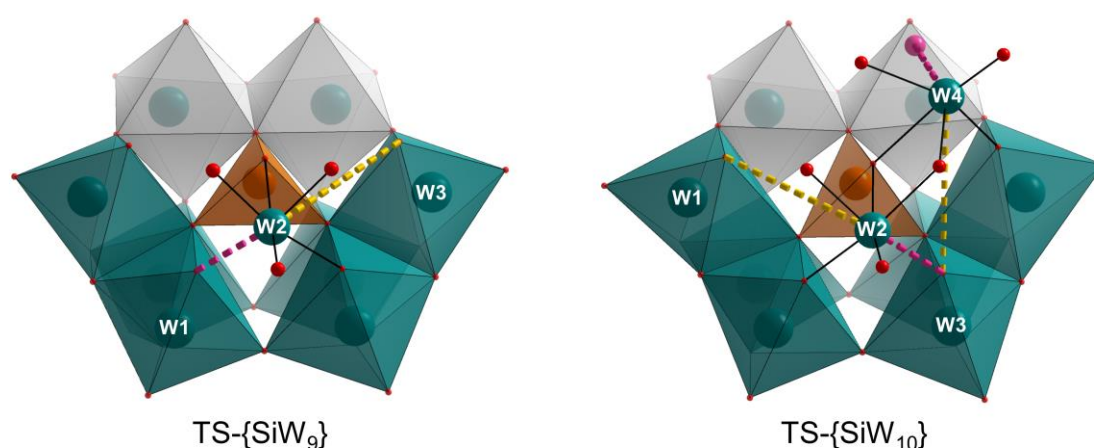

**Figure S3.** Hypothesized transition states for the  $\beta$ - to  $\gamma$ - isomerization of the  $\{\text{SiW}_9\}$  (left) and  $\{\text{SiW}_{10}\}$  (right) intermediates. Dashed lines indicate bond formation (shown in yellow) and bond breaking (pink) respectively, whilst bonds which retain their original connectivity are shown as solid lines. Note that the oxygen atom highlighted in pink present in the  $\{\text{SiW}_{10}\}$  transition state is lost upon completion of the  $\beta$ - to  $\gamma$ - transformation. Colour code: W = teal, Si = orange, O = red.

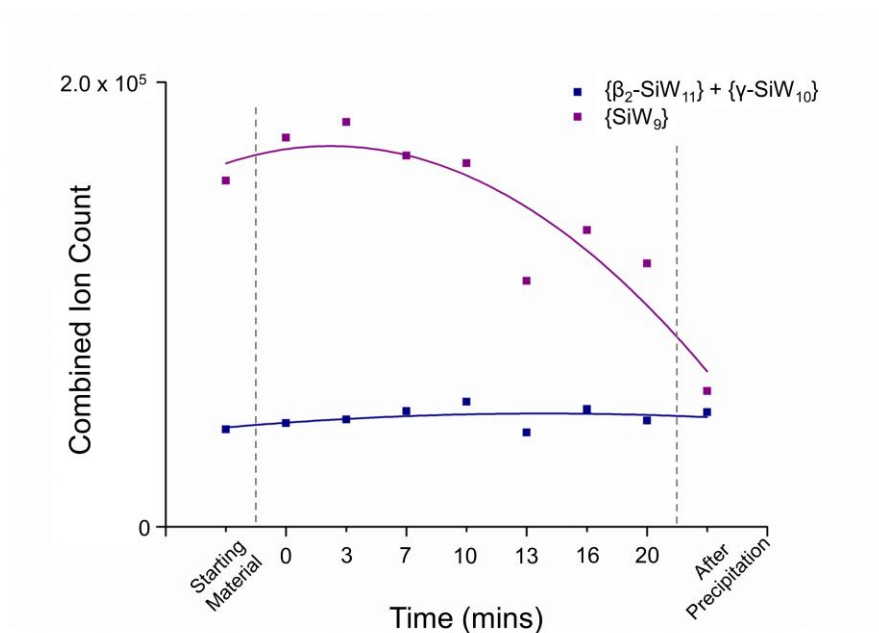

**Figure S4:** Plot of combined ion count (CIC) values for the sum of both  $\beta_2\text{-SiW}_{11}$  starting material and  $\gamma\text{-SiW}_{10}$  product *vs.* the proposed  $\text{SiW}_9$  intermediate. The respective profiles of both plots suggests that the observed abundance of  $\text{SiW}_9$  species is genuinely time-dependent and thus has a mechanistic origin rather than arising as a product of the measurement technique (*i.e.* the observed abundance is not governed by the relative amounts of either starting material or product present at any given point in the reaction coordinate). The dashed vertical lines on the plot indicate the point in the reaction coordinate at which base (left) or KCl (right) is added. The lines of best fit are provided primarily as a guide for the eye.

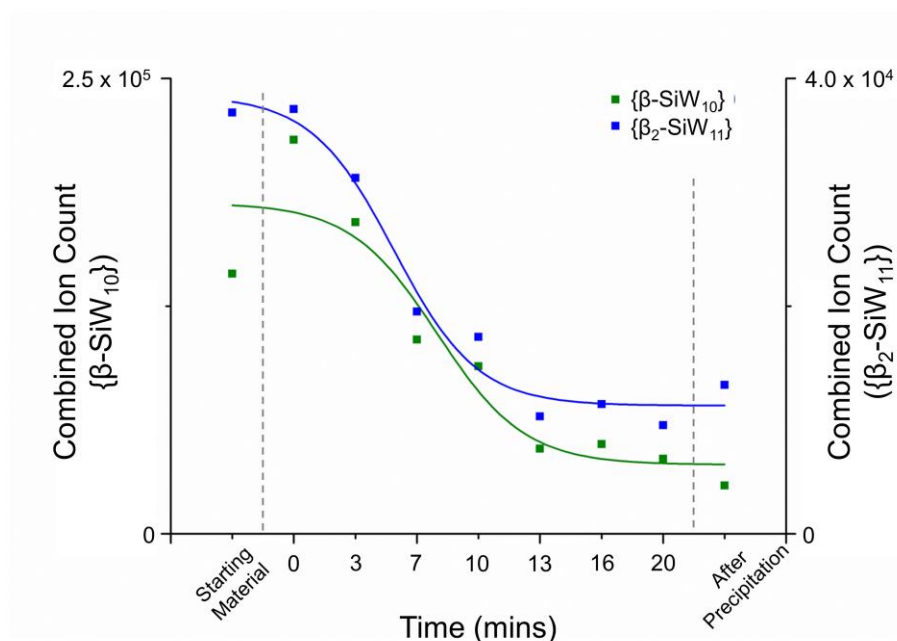

**Figure S5:** Plot of combined ion count (CIC) values for the  $\beta$ -SiW<sub>11</sub> starting material vs. the  $\beta$ -SiW<sub>10</sub> fragment. The close match between the profiles of both traces help to indicate that the  $\beta$ -SiW<sub>10</sub> fragment is likely to be a direct product of the fragmentation of the starting material. The dashed vertical lines on the plot indicate the point in the reaction coordinate at which either base (left) or KCl (right) is added. The lines of best fit are provided primarily as a guide for the eye.

**Table S2.** Frontier Orbital Energies for Several Polyoxotungstates. Energies given in eV.

| Anion                          | E(HOMO) | E(LUMO) | H-L gap |
|--------------------------------|---------|---------|---------|
| $\alpha$ -SiW <sub>12</sub>    | -6.89   | -4.19   | 2.70    |
| $\beta$ -SiW <sub>12</sub>     | -6.86   | -4.34   | 2.52    |
| $\beta$ -SiW <sub>11</sub>     | -5.68   | -2.96   | 2.72    |
| $\beta$ -SiW <sub>9</sub>      | -4.85   | -2.04   | 2.81    |
| $\gamma$ -SiW <sub>9</sub>     | -4.84   | -2.04   | 2.80    |
| $\gamma$ -SiW <sub>10</sub>    | -5.60   | -2.74   | 2.86    |
| $\beta$ -SiW <sub>11</sub> -K  | -5.77   | -3.03   | 2.74    |
| $\beta$ -SiW <sub>9</sub> -K   | -4.88   | -2.10   | 2.78    |
| $\gamma$ -SiW <sub>9</sub> -K  | -4.96   | -2.12   | 2.84    |
| $\gamma$ -SiW <sub>10</sub> -K | -5.67   | -2.82   | 2.84    |

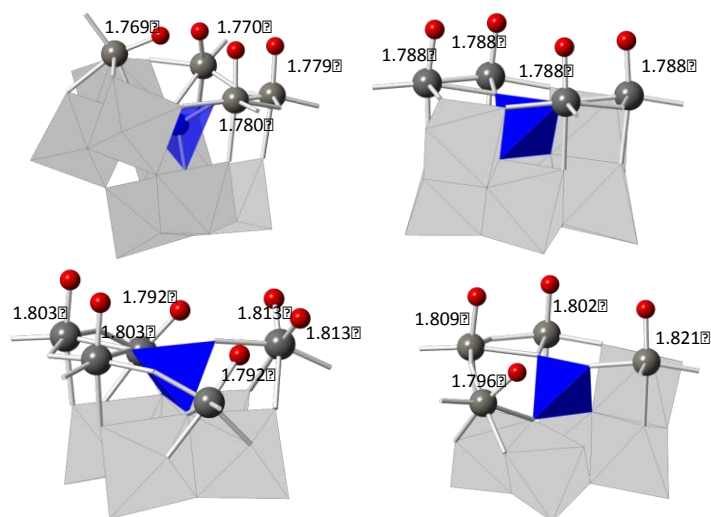

**Figure S6.** Structures computed for anions  $[\beta\text{-SiW}_{11}\text{O}_{39}]^{8-}$ ,  $[\beta\text{-SiW}_9\text{O}_{34}]^{10-}$ ,  $[\gamma\text{-SiW}_9\text{O}_{34}]^{10-}$  and  $[\gamma\text{-SiW}_{10}\text{O}_{36}]^{8-}$ .

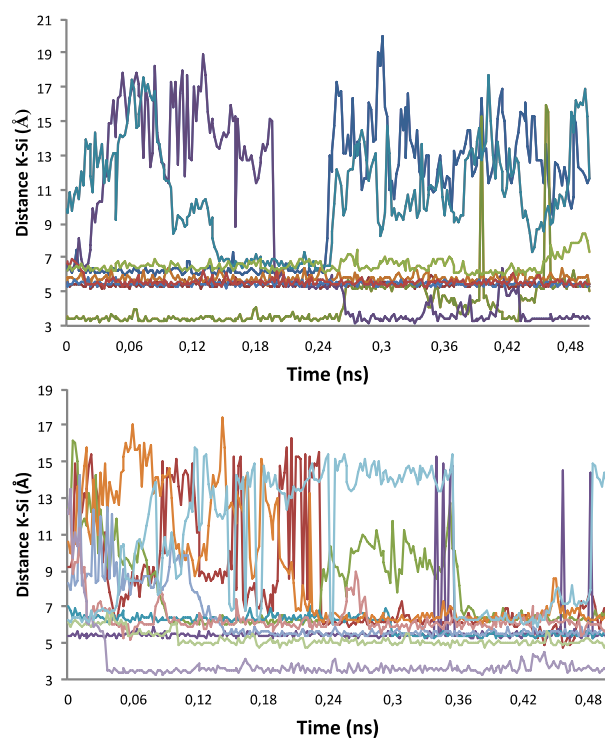

**Figure S7.** K-Si distances for the 10  $\text{K}^+$  ions for the trivalent  $\text{K}_{10}[\beta\text{-SiW}_9\text{O}_{34}]$  (top) and  $\text{K}_{10}[\gamma\text{-SiW}_9\text{O}_{34}]$  (bottom) systems along 0.5 ns of classical MD trajectories.

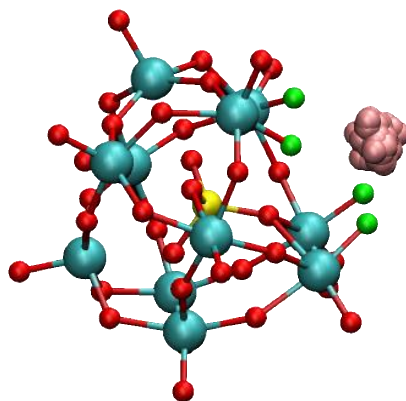

**Figure S8.** Representation of the motion of the  $K^+$  near the vacancy for a 20 ps Car-Parrinello MD trajectory of  $[\beta\text{-SiW}_{11}\text{O}_{39}]^{8-}$ . No protonation of the polyanion is observed during the trajectory.

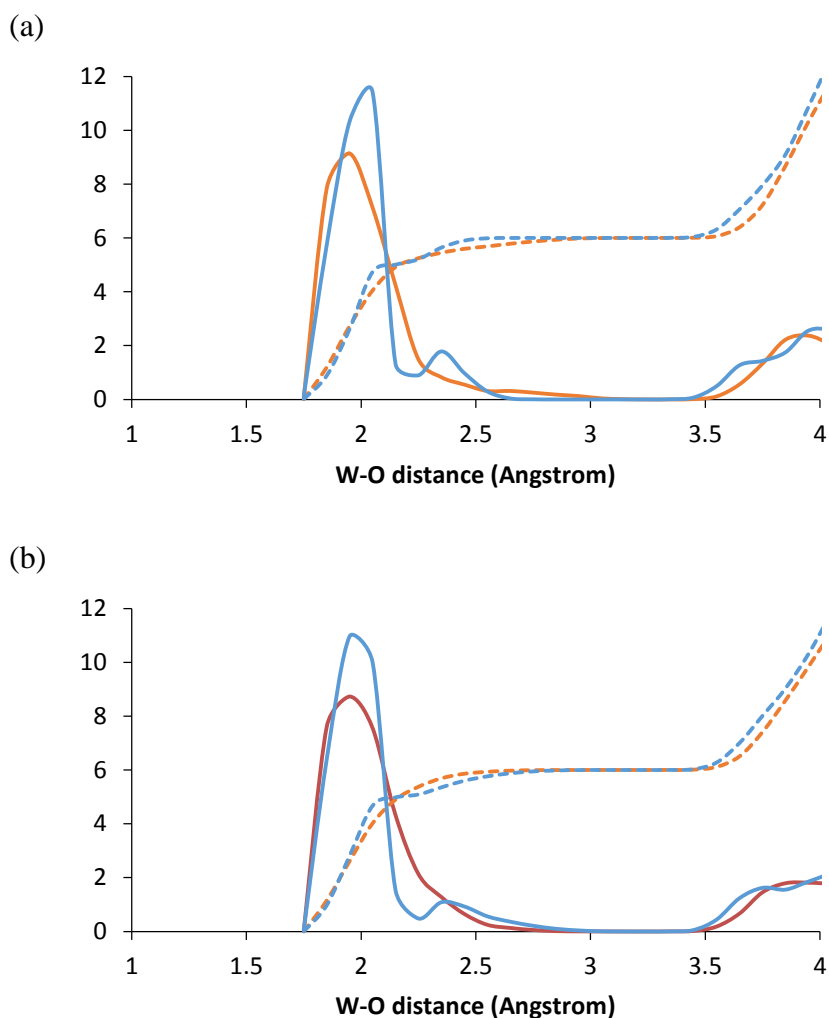

**Figure S9.** W-O radial distribution functions (solid lines) and their integrations, the coordination number (broken line), for (a) the five W atoms near the lacuna (red) and for the remaining four W atoms (blue) of the tri-lacunary  $[\beta\text{-SiW}_9\text{O}_{34}]^{10-}$ , obtained from Car-Parrinello MD trajectory (5 ps); (b) the four W atoms near the lacuna (red) and for the remaining five W atoms (blue) of the tri-lacunary  $[\gamma\text{-SiW}_9\text{O}_{34}]^{10-}$ , obtained from Car-Parrinello MD trajectory (5 ps).



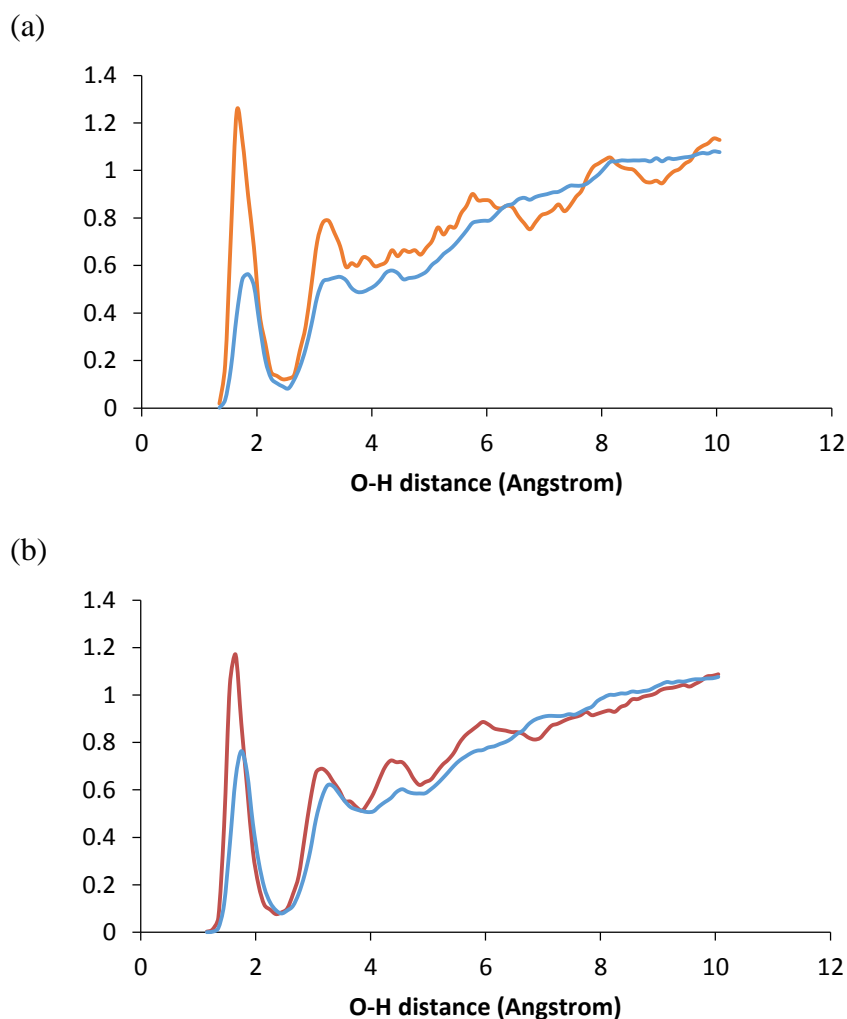

**Figure S10.** O-H radial distribution functions for (a) the five terminal O atoms in the lacuna (red) and for the remaining O atoms (blue) of the tri-lacunary  $[\beta\text{-SiW}_9\text{O}_{34}]^{10-}$ , obtained from Car-Parrinello MD trajectory (5 ps); (b) the four terminal O atoms in the lacuna (red) and for the remaining O atoms of the tri-lacunary  $[\gamma\text{-SiW}_9\text{O}_{34}]^{10-}$ , obtained from Car-Parrinello MD trajectory (5 ps).

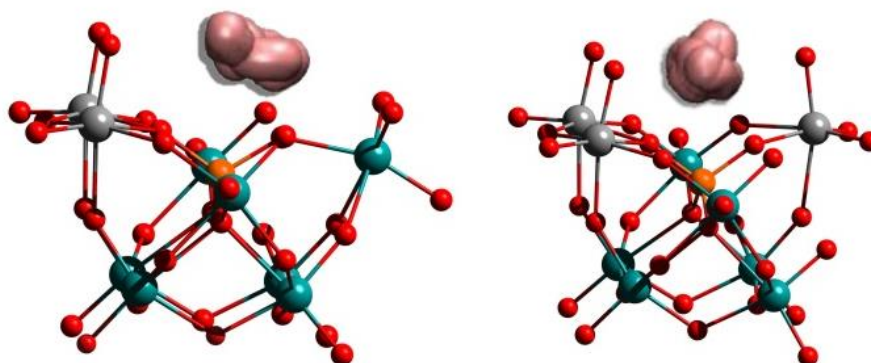

**Figure S11.** The motion of the  $\text{K}^+$  ion closer to the lacuna  $\text{K}_{10}[\beta\text{-SiW}_9\text{O}_{34}]$  and  $\text{K}_{10}[\gamma\text{-SiW}_9\text{O}_{34}]$  systems during the Car-Parrinello trajectories. Colour code: W = teal, Si = orange, O = red. Grey is used to differentiate W-centres belonging to rotated  $\{\text{W}_3\}$  triads.

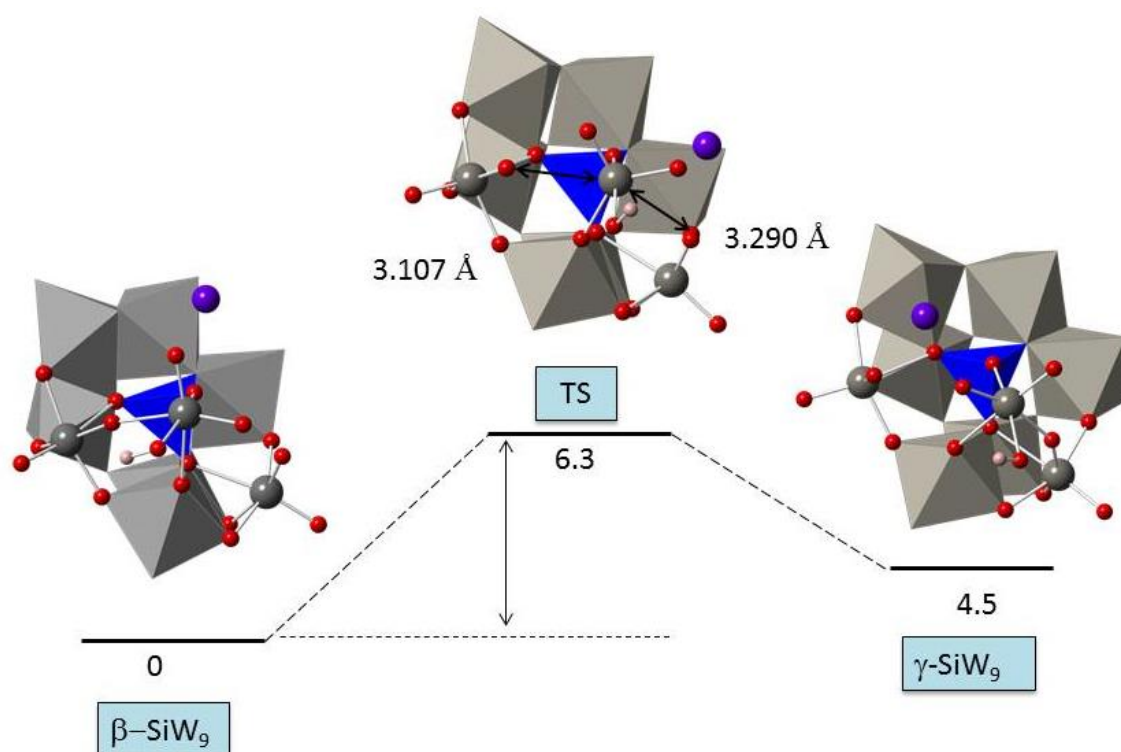

**Figure S12.** Energy profile (in  $\text{kcal}\cdot\text{mol}^{-1}$ ) for the monoprotinated  $\{\beta\text{-SiW}_9\}$  to  $\{\gamma\text{-SiW}_9\}$  transformation, the transition state (TS) structure.

**Table S3.** xyz coordinates for the optimized structure of  $\gamma$ -SiW9

| $\gamma$ -SiW9 |           |           |           |
|----------------|-----------|-----------|-----------|
| 1.K            | -0.720655 | 0.940855  | -3.736331 |
| 2.Si           | 0.057021  | -0.150724 | -0.690767 |
| 3.W            | -1.619979 | -2.452025 | -2.645525 |
| 4.W            | -3.495379 | 0.324659  | -0.418010 |
| 5.W            | 2.214068  | 2.742726  | -1.079434 |
| 6.W            | 3.622526  | -0.774572 | -0.802086 |
| 7.W            | 2.293342  | 0.591487  | 2.086974  |
| 8.W            | -1.993814 | -2.150602 | 1.297711  |
| 9.W            | -1.507094 | 1.174008  | 2.292669  |
| 10.W           | 1.671622  | -2.774843 | 1.186182  |
| 11.W           | -1.142563 | 3.238419  | -0.927750 |
| 12.O           | -0.234941 | -1.115794 | -1.977428 |
| 13.O           | -1.264929 | -0.212104 | 0.323687  |
| 14.O           | 0.216918  | 1.410574  | -1.209661 |
| 15.O           | 1.421572  | -0.655891 | 0.131005  |
| 16.O           | -0.146176 | -2.490600 | 1.836495  |
| 17.O           | 0.332361  | 0.733989  | 2.613745  |
| 18.O           | -2.609016 | 1.967895  | -1.059475 |
| 19.O           | 2.964704  | -1.535874 | -2.283674 |
| 20.O           | -1.016316 | 2.557760  | 1.123188  |
| 21.O           | 1.139015  | -3.639709 | -0.281703 |
| 22.O           | 1.987221  | 2.065399  | 0.918606  |
| 23.O           | -1.713838 | -2.851204 | -0.383335 |
| 24.O           | 3.195943  | 1.058565  | -1.322489 |
| 25.O           | -2.991522 | -0.580168 | -1.928021 |
| 26.O           | -2.012296 | -0.723091 | 2.732550  |
| 27.O           | -1.129248 | 3.516045  | -2.716638 |
| 28.O           | 2.170346  | -1.263752 | 2.601759  |
| 29.O           | -0.544760 | -3.863031 | -2.946088 |
| 30.O           | 0.694394  | 3.914840  | -0.613351 |
| 31.O           | 3.452999  | -2.335026 | 0.374121  |
| 32.O           | -3.275022 | 1.205763  | 1.403080  |
| 33.O           | -3.697356 | -1.303402 | 0.639075  |
| 34.O           | 3.870859  | 0.192389  | 1.120103  |
| 35.O           | -1.669723 | -1.663705 | -4.289065 |
| 36.O           | 2.048274  | 2.956838  | -2.866108 |
| 37.O           | -3.260459 | -3.256777 | -2.586614 |
| 38.O           | -5.211869 | 0.740921  | -0.717366 |
| 39.O           | 3.548660  | 3.869220  | -0.667444 |
| 40.O           | 5.395689  | -0.804892 | -1.086226 |
| 41.O           | 2.979166  | 1.359981  | 3.555206  |
| 42.O           | -2.792472 | -3.477075 | 2.206026  |
| 43.O           | -1.936452 | 2.009124  | 3.819406  |
| 44.O           | 2.206251  | -4.100787 | 2.275621  |
| 45.O           | -2.010842 | 4.702780  | -0.350984 |

**Table S4.** xyz coordinates for the optimized structure of  $\beta$ -SiW9

| $\beta$ -SiW9 |           |           |           |
|---------------|-----------|-----------|-----------|
| 1.K           | -1.496965 | 0.776263  | -3.480122 |
| 2.Si          | -0.014971 | -0.035168 | -0.720186 |
| 3.W           | -0.727699 | -2.979259 | -2.397785 |
| 4.W           | -3.685282 | 0.643599  | -0.330910 |
| 5.W           | 2.181049  | 2.737876  | -1.103710 |
| 6.W           | 3.499089  | -0.821747 | -0.944861 |
| 7.W           | 2.256253  | 0.493083  | 2.021307  |
| 8.W           | -2.176880 | -2.008386 | 1.206270  |
| 9.W           | -1.490714 | 1.221230  | 2.326779  |
| 10.W          | 1.455963  | -2.799499 | 0.989426  |
| 11.W          | -1.101021 | 3.398493  | -0.797669 |
| 12.O          | -0.276208 | -0.999106 | -2.005373 |
| 13.O          | -1.359525 | -0.071996 | 0.273577  |
| 14.O          | 0.206969  | 1.535765  | -1.208996 |
| 15.O          | 1.351242  | -0.565151 | 0.063311  |
| 16.O          | -0.349864 | -2.508830 | 1.689063  |
| 17.O          | 0.346664  | 0.607207  | 2.578752  |
| 18.O          | -2.652167 | 2.214697  | -0.898543 |
| 19.O          | 2.833655  | -1.417639 | -2.489764 |
| 20.O          | -0.911682 | 2.613434  | 1.207520  |
| 21.O          | 0.722511  | -3.283274 | -0.629447 |
| 22.O          | 2.041445  | 2.036990  | 0.995023  |
| 23.O          | -1.954298 | -2.671918 | -0.492350 |
| 24.O          | 3.128565  | 1.062524  | -1.366568 |
| 25.O          | -3.548101 | -0.097230 | -1.971061 |
| 26.O          | -2.062511 | -0.665769 | 2.704492  |
| 27.O          | -1.140749 | 3.691919  | -2.581091 |
| 28.O          | 2.062391  | -1.504517 | 2.389047  |
| 29.O          | 0.630536  | -3.249548 | -3.557995 |
| 30.O          | 0.759133  | 3.977805  | -0.515101 |
| 31.O          | 3.226189  | -2.465279 | 0.086770  |
| 32.O          | -3.260620 | 1.410731  | 1.576134  |
| 33.O          | -3.853696 | -1.032836 | 0.635238  |
| 34.O          | 3.805382  | 0.007383  | 1.034734  |
| 35.O          | -2.071829 | -2.498666 | -3.511745 |
| 36.O          | 2.045981  | 3.097864  | -2.858281 |
| 37.O          | -1.182400 | -4.725009 | -2.043249 |
| 38.O          | -5.369843 | 1.251997  | -0.322156 |
| 39.O          | 3.553383  | 3.790903  | -0.614426 |
| 40.O          | 5.272254  | -0.898635 | -1.221374 |
| 41.O          | 3.001287  | 1.061758  | 3.552264  |
| 42.O          | -3.055607 | -3.310643 | 2.075508  |
| 43.O          | -1.753703 | 2.007332  | 3.917450  |
| 44.O          | 1.873244  | -4.352568 | 1.774998  |
| 45.O          | -1.876353 | 4.886216  | -0.156581 |

**Table S5.** xyz coordinates for the optimized structure of TS-SiW9

| TS-SiW9 |           |           |           |
|---------|-----------|-----------|-----------|
| 1.K     | -1.388494 | 0.850451  | -3.525904 |
| 2.Si    | 0.023444  | -0.083687 | -0.694519 |
| 3.W     | -1.124021 | -2.772761 | -2.585612 |
| 4.W     | -3.637783 | 0.523776  | -0.364417 |
| 5.W     | 2.189818  | 2.713728  | -1.097546 |
| 6.W     | 3.553750  | -0.819638 | -0.863031 |
| 7.W     | 2.270538  | 0.530935  | 2.053668  |
| 8.W     | -2.047940 | -2.036741 | 1.223562  |
| 9.W     | -1.500966 | 1.220108  | 2.316806  |
| 10.W    | 1.587032  | -2.807876 | 1.119917  |
| 11.W    | -1.122726 | 3.343789  | -0.845468 |
| 12.O    | -0.259425 | -1.030733 | -1.995206 |
| 13.O    | -1.319386 | -0.105782 | 0.294493  |
| 14.O    | 0.208661  | 1.478151  | -1.203458 |
| 15.O    | 1.370775  | -0.644286 | 0.110736  |
| 16.O    | -0.227829 | -2.475812 | 1.763122  |
| 17.O    | 0.334103  | 0.679287  | 2.592579  |
| 18.O    | -2.655615 | 2.130751  | -0.931511 |
| 19.O    | 2.875188  | -1.552387 | -2.347367 |
| 20.O    | -0.968616 | 2.621699  | 1.190761  |
| 21.O    | 0.973477  | -3.605812 | -0.366894 |
| 22.O    | 1.993941  | 2.029175  | 0.926481  |
| 23.O    | -1.732047 | -2.686563 | -0.494735 |
| 24.O    | 3.133128  | 1.022072  | -1.377571 |
| 25.O    | -3.418845 | -0.245069 | -1.983654 |
| 26.O    | -2.031055 | -0.704455 | 2.703352  |
| 27.O    | -1.155369 | 3.599782  | -2.634798 |
| 28.O    | 2.130185  | -1.351669 | 2.535868  |
| 29.O    | 0.344017  | -3.529837 | -3.282307 |
| 30.O    | 0.728418  | 3.950290  | -0.569060 |
| 31.O    | 3.355374  | -2.404845 | 0.281153  |
| 32.O    | -3.272676 | 1.318193  | 1.535726  |
| 33.O    | -3.759729 | -1.157102 | 0.605168  |
| 34.O    | 3.835088  | 0.106734  | 1.061619  |
| 35.O    | -1.899686 | -1.964741 | -4.003489 |
| 36.O    | 2.041193  | 3.025121  | -2.866531 |
| 37.O    | -2.214933 | -4.245465 | -2.444475 |
| 38.O    | -5.344656 | 1.064214  | -0.409871 |
| 39.O    | 3.556750  | 3.787279  | -0.641207 |
| 40.O    | 5.323434  | -0.871371 | -1.160564 |
| 41.O    | 2.990994  | 1.245073  | 3.534818  |
| 42.O    | -2.895304 | -3.386026 | 2.052440  |
| 43.O    | -1.829267 | 2.002233  | 3.895693  |
| 44.O    | 2.076329  | -4.188293 | 2.156903  |
| 45.O    | -1.929273 | 4.833046  | -0.249972 |

## **References**

1. Contant, R.; Tézé, A. *Inorganic Syntheses*; John Wiley & Sons., Hoboken, NJ, USA 1990; Vol. 27.
2. Canny, J.; Tézé, A.; Thouvenot, R.; Hervé, G. *Inorg. Chem.* **1986**, 25, 2114.
